# Supplementary material
Source: publisher figshare collection journal article supplement (https://frontiersin.figshare.com/ndownloader/files/34505702)
Supplement: Supplementary file [file 34505702]

**Figure S1**

**A**

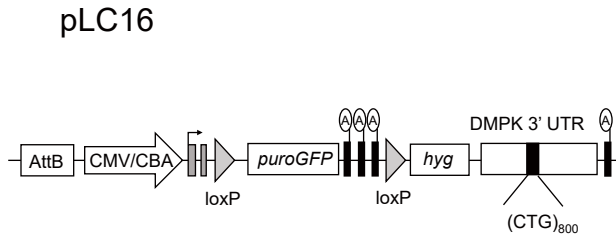

**B**

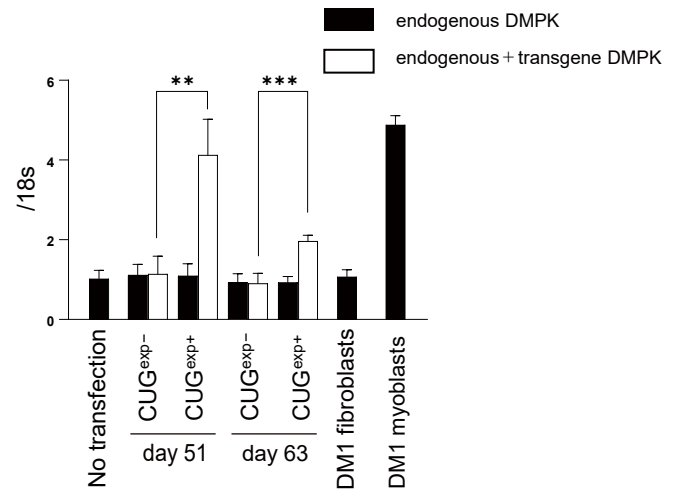

**C**

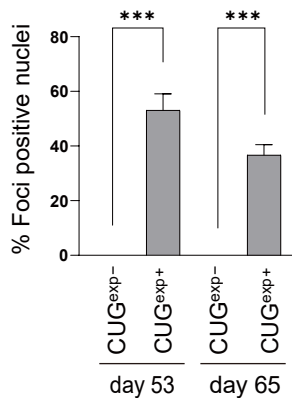

**D**

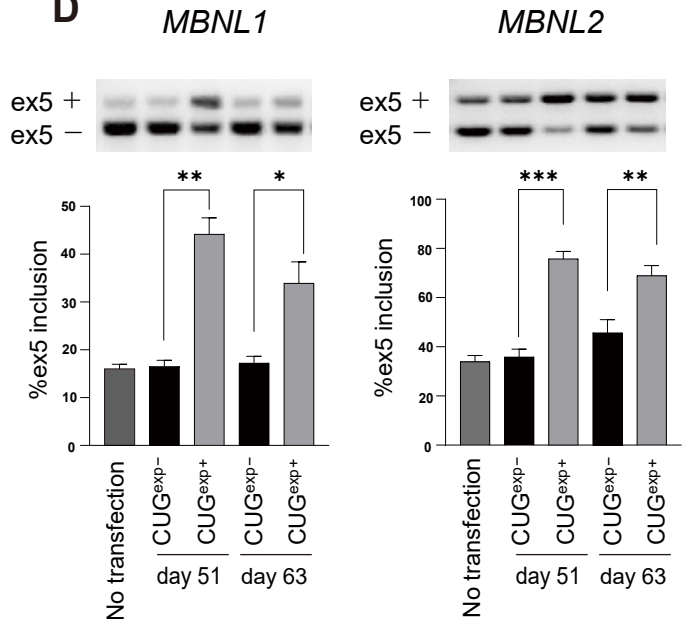

### Supplemental Figure S1

**(A)** Diagram of pLC16, a construct for conditional expression of expanded CTG repeats. Initially this construct expresses the puromycin resistance-GFP (*puroGFP*) selectable marker. The triple 'A' denotes the transcription-terminator element, consisting of three consecutive SV40 polyadenylation signals. Upon *Cre*-mediated excision of the selection cassette and transcription terminator, the construct expresses the hygromycin selectable marker (*hyg*), fused to the 3' -UTR from *DMPK*. **(B)** RNA levels of *DMPK* 3'-UTR (transgene + endogenous) and endogenous *DMPK* in non-transfected TIG-3 cells (no transfection), CUG<sup>exp-</sup> and CUG<sup>exp+</sup> cells, DM1 fibroblasts, and DM1 myoblasts, determined by quantitative real-time reverse transcriptase (qRT)-PCR. Mean  $\pm$  SD. \*\* $p < 0.01$ , and \*\*\* $p < 0.001$ . **(C)** Histogram showing the percentage of cells with nuclear foci of CUG<sup>exp</sup> RNA in CUG<sup>exp-</sup> and CUG<sup>exp+</sup> cells at days 53 and 65. The number of cells counted was at least 100 for each experiment. Mean  $\pm$  SD,  $n = 3$  or more. \*\*\* $p < 0.001$ . **(D)** Analysis of alternative splicing of *MBNL1* exon 5 and *MBNL2* exon 5 by RT-PCR in CUG<sup>exp-</sup> and CUG<sup>exp+</sup> cells at days 51 and 63. Top: representative gel images of RT-PCR assays. Bottom: bar graph representation of splicing abnormality. Mean  $\pm$  SD. \* $p < 0.05$ , \*\* $p < 0.01$ , and \*\*\* $p < 0.001$ .
